# Supplementary material for: Focal adhesion dynamics-mediated cell migration and proliferation on silica bead arrays
Source: Royal Society of Chemistry journal article supplement (doi:10.1039/d4bm01659a), 2025-01-01
Supplement: d4bm01659a4.pdf [file d4bm01659a4.pdf]

## Electrophoretic gels and blots

### Focal adhesion dynamics-mediated cell migration and proliferation on silica bead arrays†

Yi-Seul Park,<sup>a</sup> Yerin Choi<sup>b</sup> and Jin Seok Lee<sup>\*b</sup>

<sup>a</sup>*Materials and Life Science Research Division, Korea Institute of Science and Technology, Seoul 02792, South Korea*

<sup>b</sup>*Department of Chemistry and Research Institute for Convergence of Basic Sciences, Hanyang University, Seoul 04763, South Korea*

\*E-mail: [jseoklee@hanyang.ac.kr](mailto:jseoklee@hanyang.ac.kr)

Fig. 2c

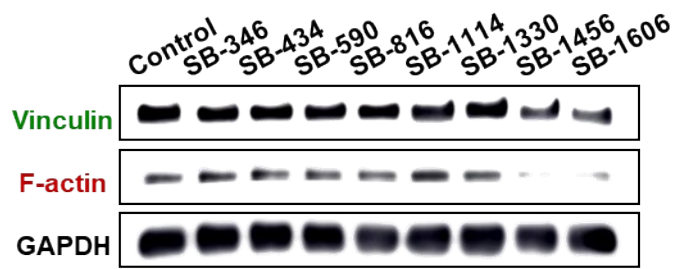

### 1. Vinculin

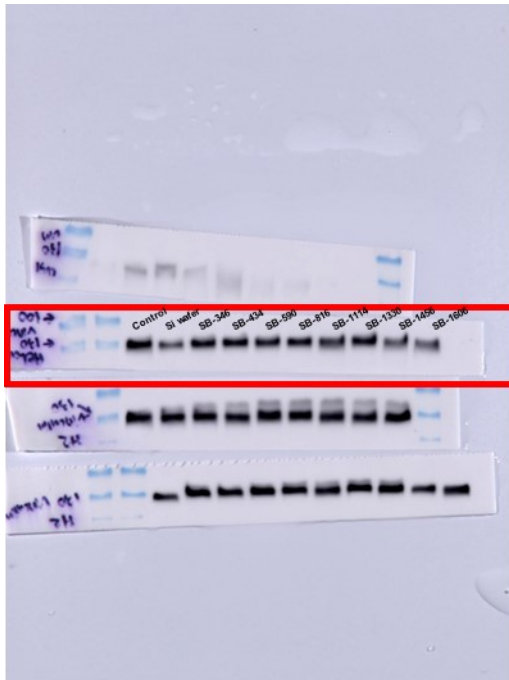

> The second band (Red box) from the top is the vinculin band. In order, they are Control(glass), Silicon wafer, Silica bead arrays 346, 434, 590, 816, 1114, 1330, 456, and 1606 nm. I deleted the Silicon wafer band because it is not mentioned in this paper.

## 2. F-actin

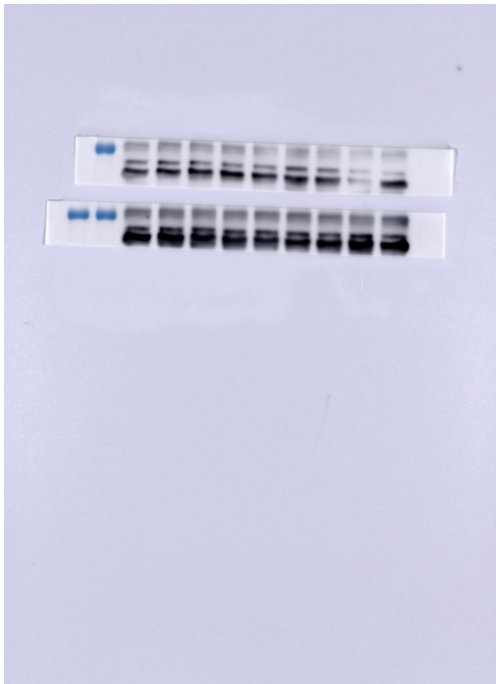

> The top band is the F-actin band.

## 3. GAPDH

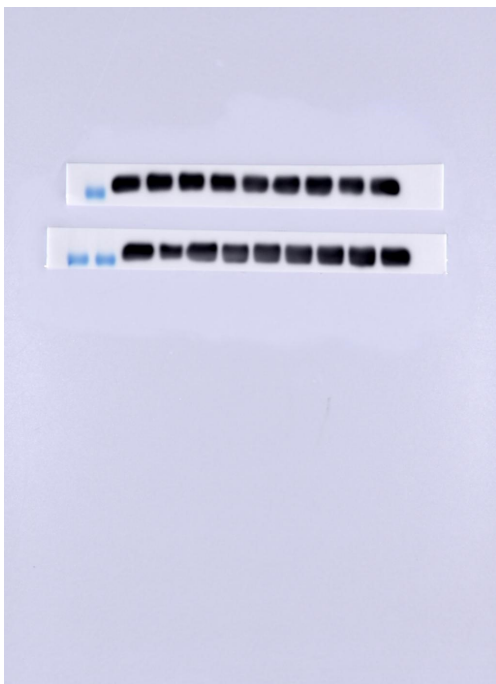

> The top band is the GAPDH band.
