# Supplementary figures and images for: Focal adhesion dynamics-mediated cell migration and proliferation on silica bead arrays
Source: Royal Society of Chemistry journal article supplement (doi:10.1039/d4bm01659a), 2025-01-01

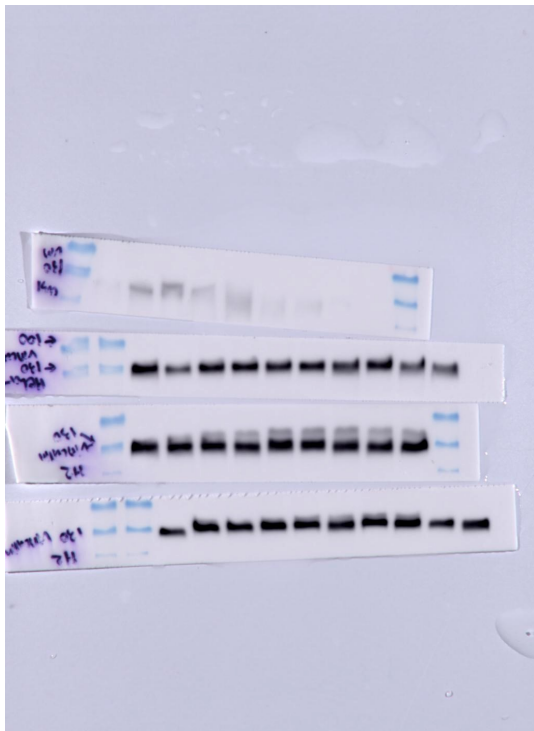

Supplement: d4bm01659a1.pdf [file d4bm01659a1.pdf]

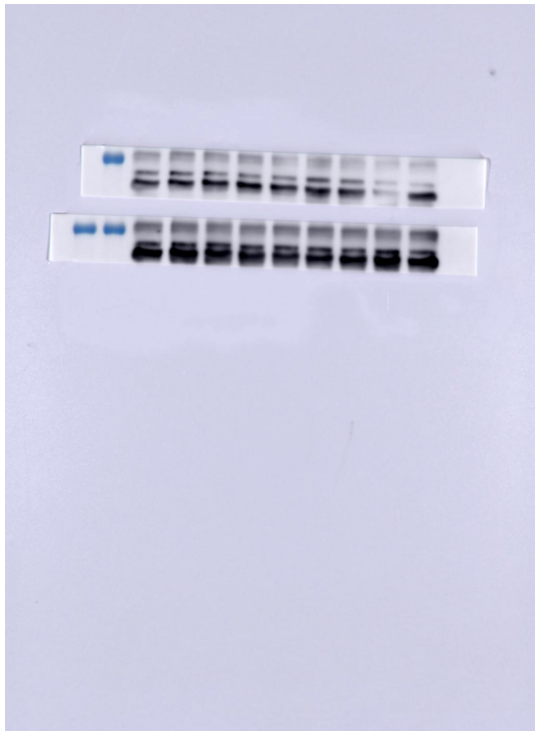

Supplement: d4bm01659a2.pdf [file d4bm01659a2.pdf]

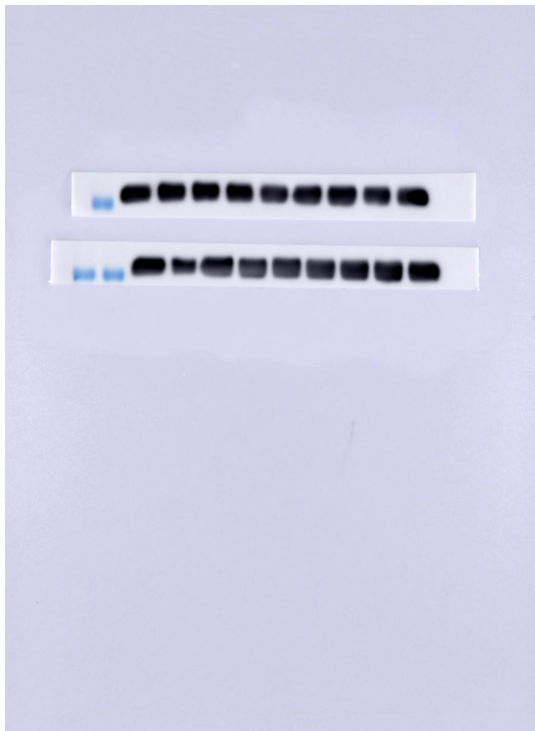

Supplement: d4bm01659a3.pdf [file d4bm01659a3.pdf]
